# Supplementary material for: Mouse EWSR1 is crucial for spermatid post-meiotic transcription and spermiogenesis
Source: Oxford University Press journal article supplement (doi:10.1242/dev.199414), 2021-05-21
Supplement: dev199414supp.pdf [file dev199414supp.pdf]

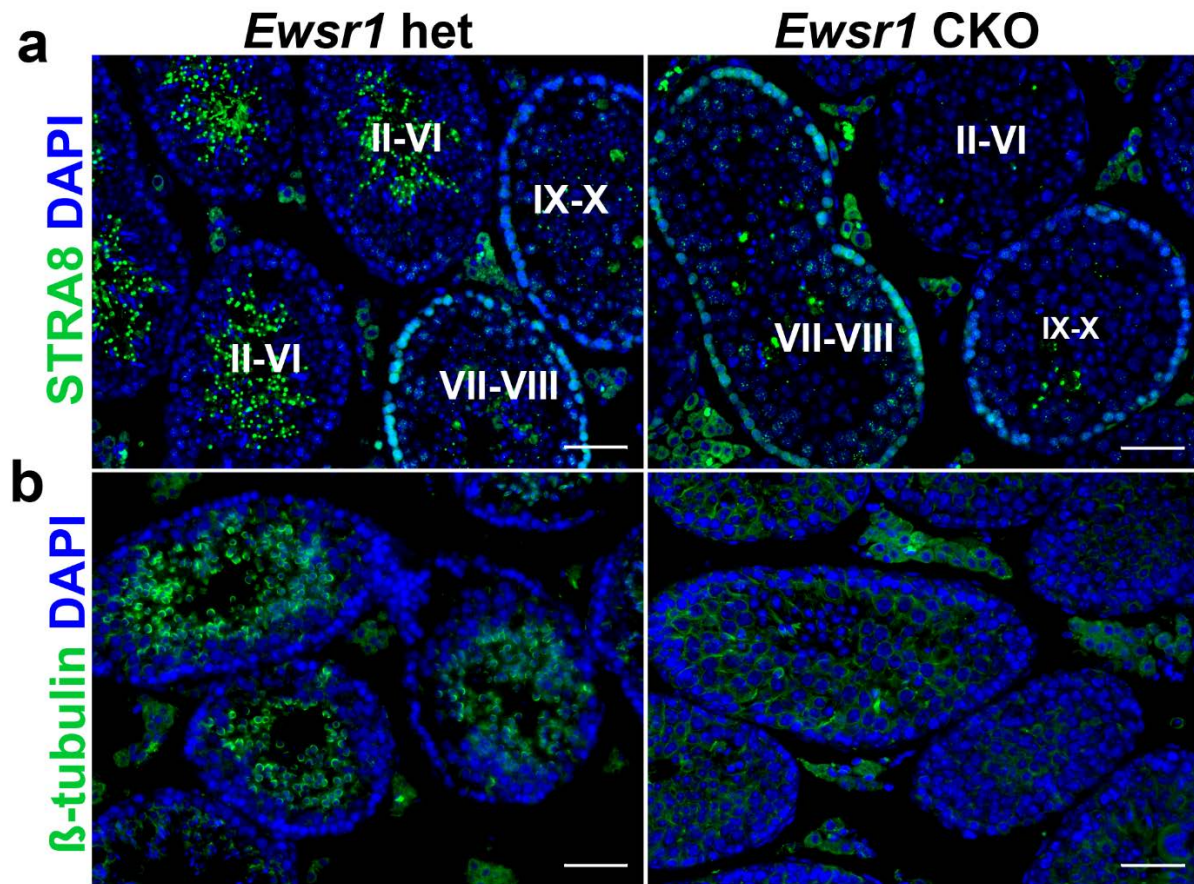

**Figure S1. Loss of elongated spermatids in *Ewsr1* CKO seminiferous tubules.**

(A) Immunostaining of STRA8 (green) in *Ewsr1* het (left panel) and CKO (right panel) testicular cross sections. The numbers indicate the stage of each seminiferous tubule. (B) Immunostaining of the elongated spermatid marker β-tubulin in *Ewsr1* het (left panel) and CKO (right panel) testicular cross sections. Scale bar, 50 μm.

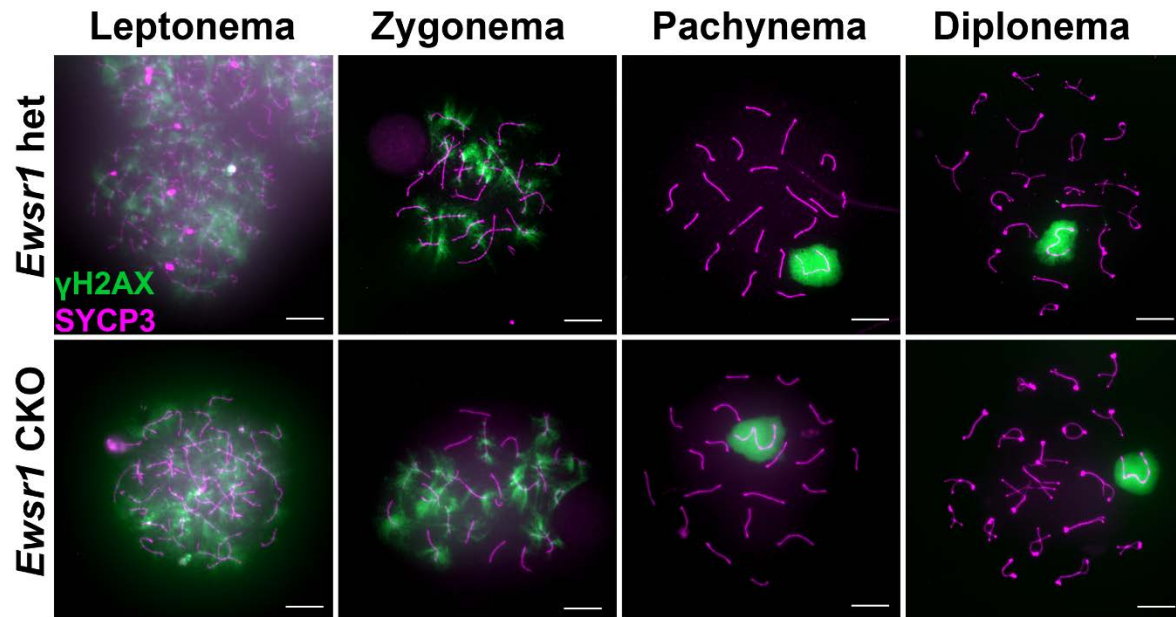

**Figure S2. Meiotic recombination is not affected in the absence of EWSR1.**

Immunostaining of  $\gamma$ H2AX (green) and SYCP3 (magenta) in leptonema, zygonema, pachynema and diplonema of *Ewsr1* het (top panels) and CKO (bottom panels) spermatocytes.

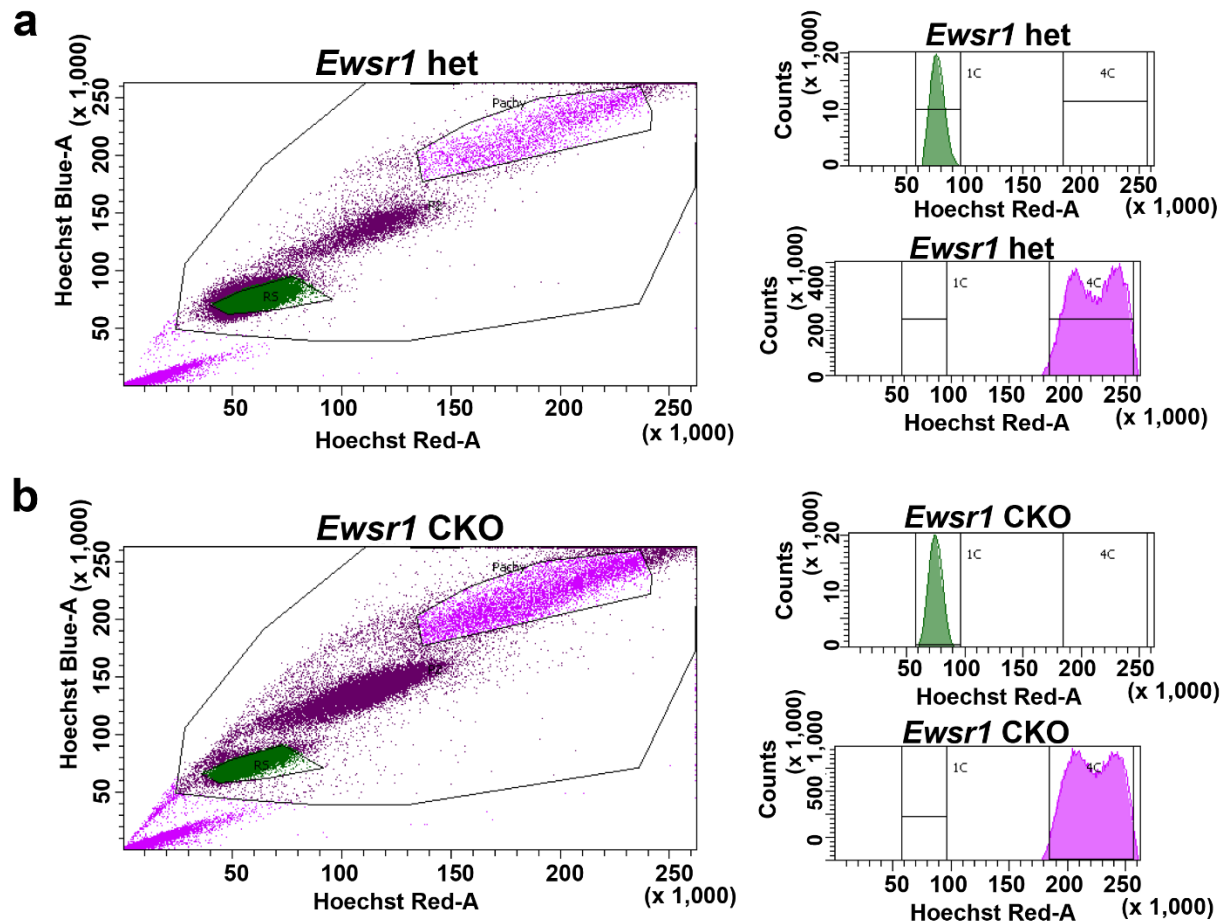

**Figure S3. Flow cytometry sorting of pachynema/diplonema and round spermatids in *Ewsr1* het and CKO mice.**

(A and B) 4C (pachynema/diplonema) and 1C (RS) cells were sorted based on DNA content by Hoechst 43342 staining of *Ewsr1* het (A) and CKO (B) isolated testicular germ cells.

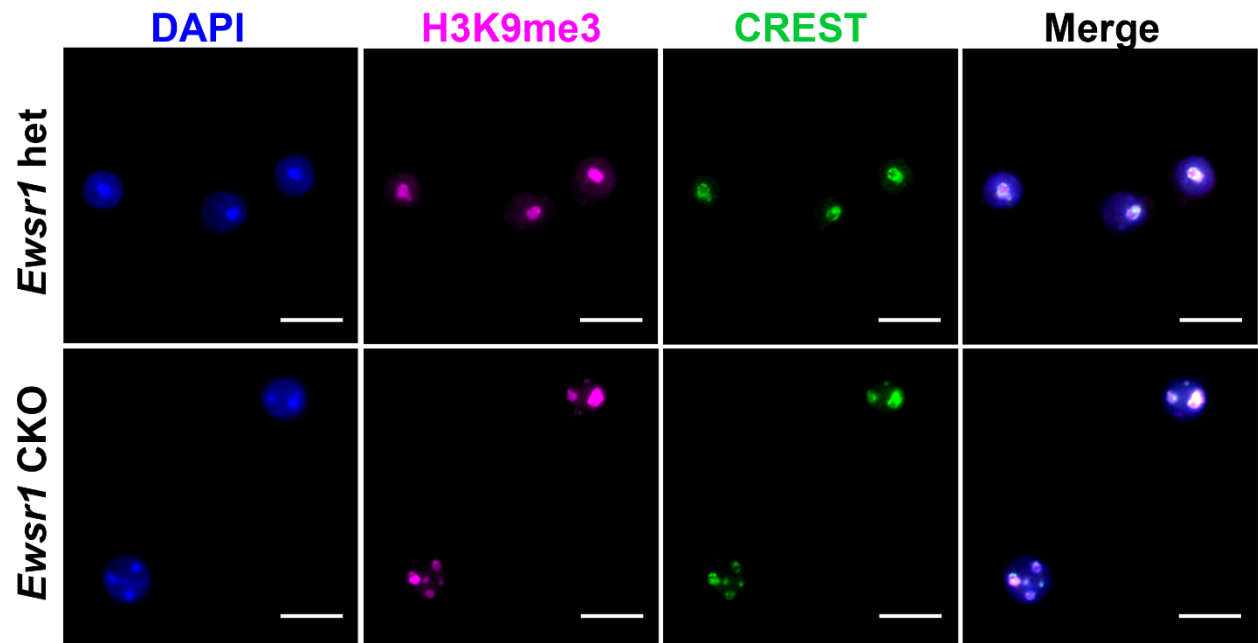

**Figure S4. Increased chromocenter fragmentation in isolated round spermatids in *Ewsr1* CKO mice.**

Co-immunostaining of H3K9me3 (magenta) and centromeres (CREST, green) in flow cytometry-sorted RS in *Ewsr1* het (top panels) and CKO (bottom panels) mice. Scale bar, 10 μm.

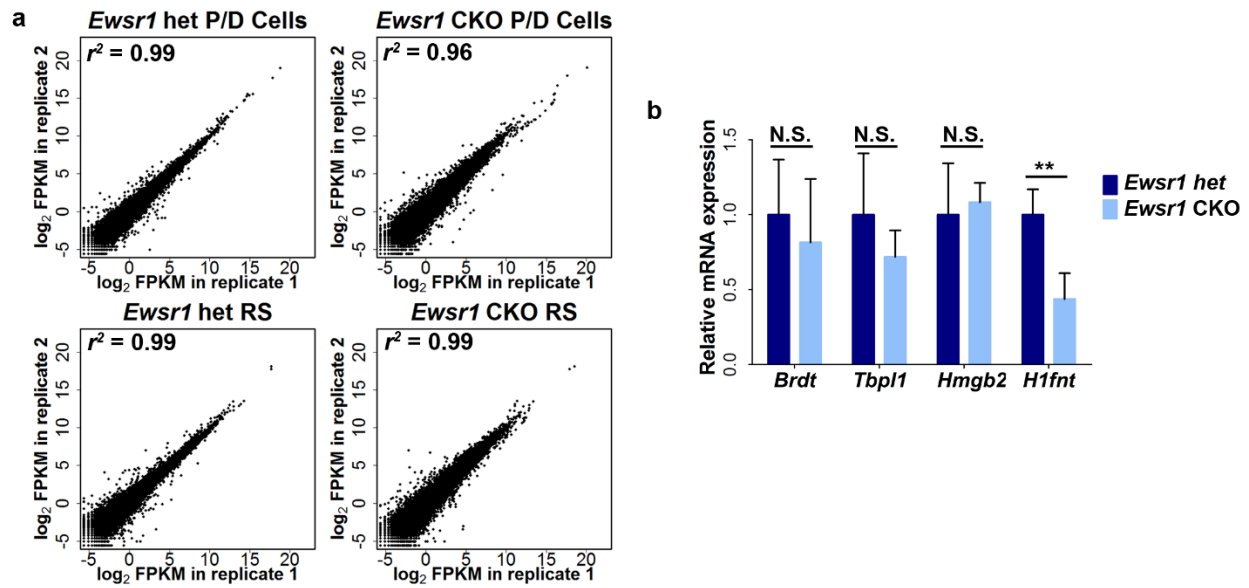

**Figure S5. The transition from a meiotic to a spermiogenesis gene-expression program is affected in *Ewsr1* CKO mice.**

(A) Correlation between replicates of P/D and of RS samples.  $R^2$  values are shown in the upper left-hand corners. (B) QRT-PCR of chromocenter formation-related genes expression in 21-dpp *Ewsr1* het (dark blue) and CKO (light blue) mouse testis extracts.  $\beta$ -Actin mRNA levels were used for normalization. N.S., not significant ( $p > 0.05$  by Student's  $t$ -test), \*\*  $p < 0.01$  by Student's  $t$ -test. Data is shown as mean  $\pm$  SD with 3 replicates.
